# Supplementary material for: Folding path of P5abc RNA involves direct coupling of secondary and tertiary structures
Source: PubMed Central journal article supplement — Nucleic Acids Res. 2012 May 28;40(16):8011–20. doi: 10.1093/nar/gks468 (PMC3439887; doi:10.1093/nar/gks468), 2012-05-28
Supplement: supp_gks468_nar-00974-r-2012-File009.pdf [file supp_gks468_nar-00974-r-2012-File009.pdf]

## SUPPLEMENTARY INFORMATION

### Folding path of P5abc RNA involves direct coupling of secondary and tertiary structure

Eda Koculi<sup>1,‡</sup> Samuel S. Cho<sup>2,‡</sup>, D. Thirumalai<sup>2,\*</sup>, and Sarah A. Woodson<sup>1,\*</sup>

<sup>1</sup>T. C. Jenkins Department of Biophysics, Johns Hopkins University, 3400 N. Charles St., Baltimore, MD 21218 USA and <sup>2</sup>Program in Biophysics, Institute for Physical Sciences and Technology, and Department of Chemistry, University of Maryland, College Park, MD 20742 USA

FIGURE S1

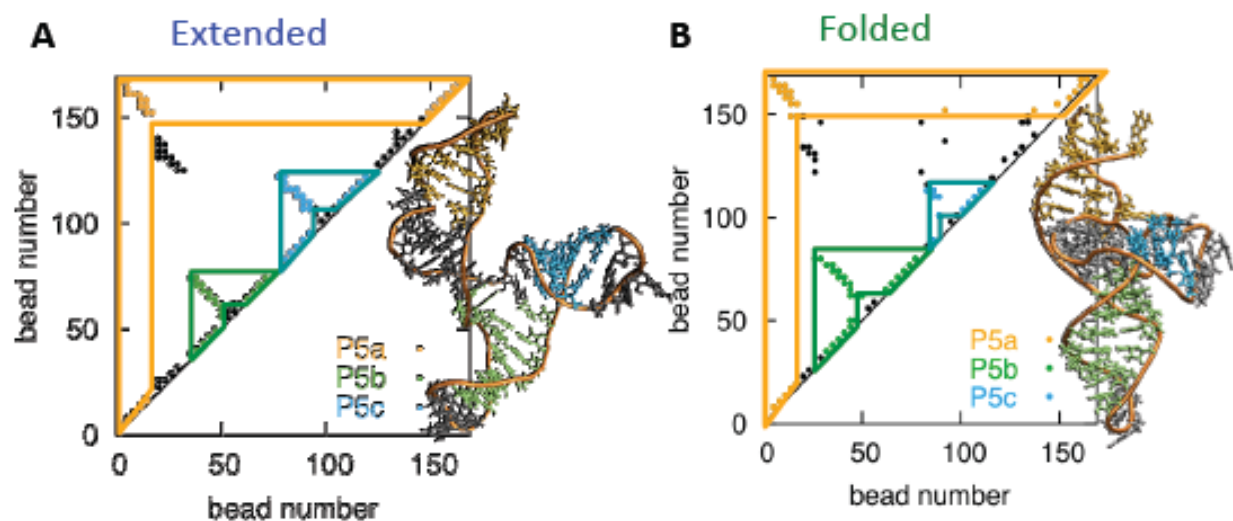

**Figure S1. The structure of the extended and folded conformations of tP5abc.** A, B. For the extended (A) and folded structures (B), the native interaction map and the corresponding tertiary structures are shown. For the native interaction map, each point represents a pair of bases whose distance is less than 8 Å in the NMR and crystallographic structures of the extended and folded conformations of tP5abc, respectively.

**FIGURE S2**

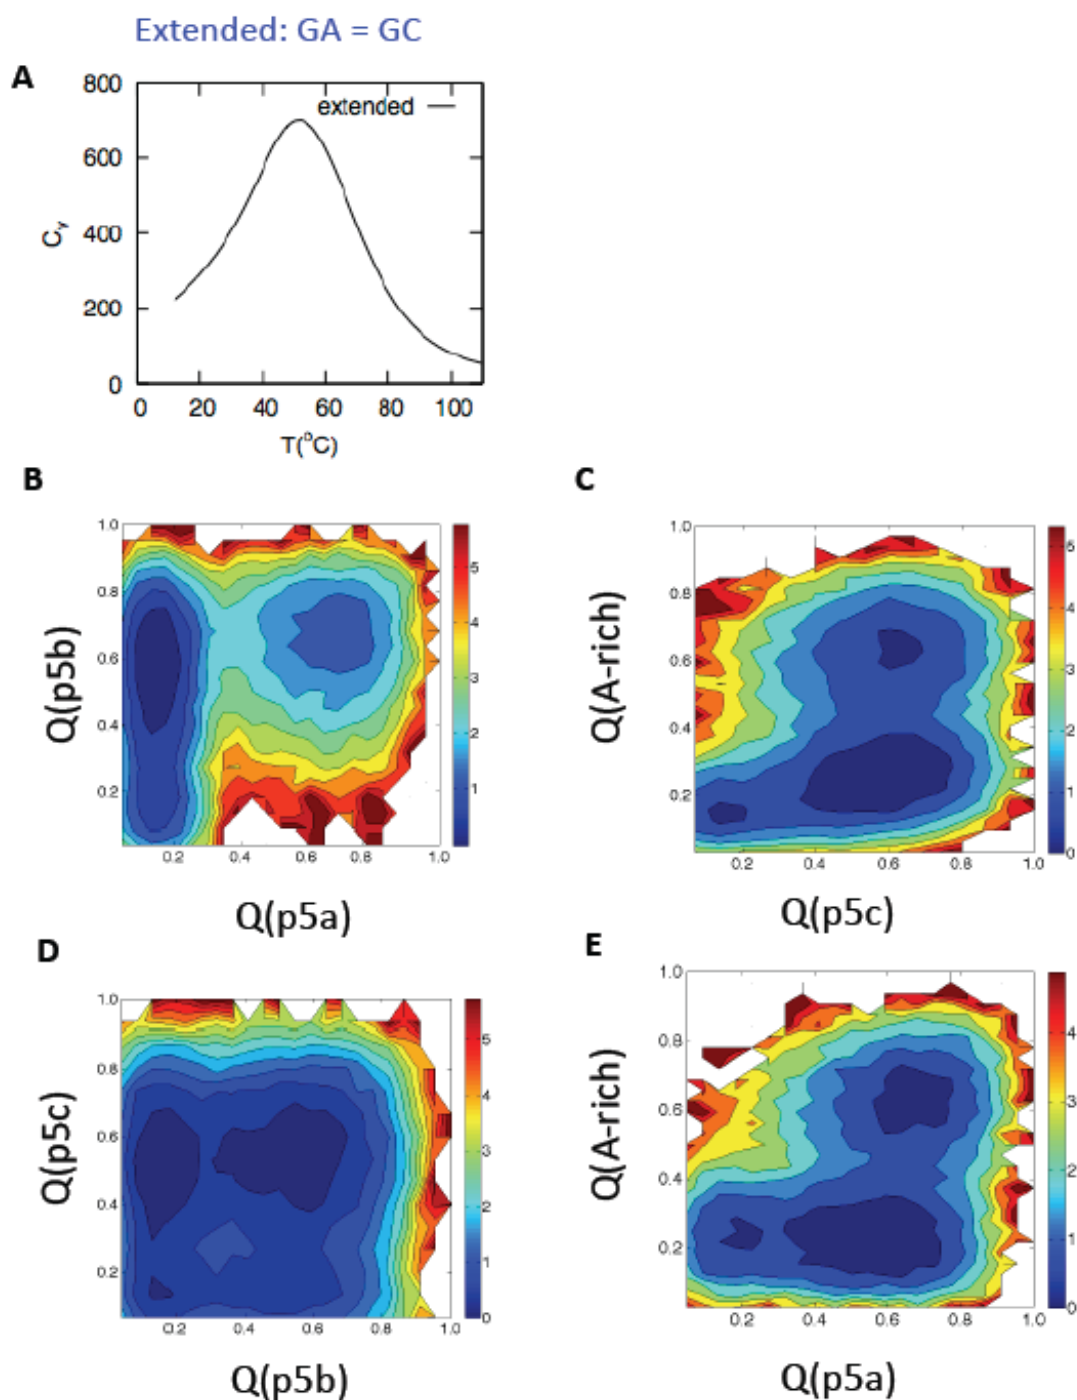

**Figure S2. Comparison of free energy landscapes with G-A and G-C pairs.** Since the stacking interaction energies of the G-A base pairs are not known, those energies were assigned to be the same as if they were G-C pairs, which would be expected to be the upper limit. **A.** Specific heat profile with respect to temperature. **B-F.** Free energy profiles projected to the fraction of native contacts ( $Q$ ) of various parts of tP5abc.

**FIGURE S3**

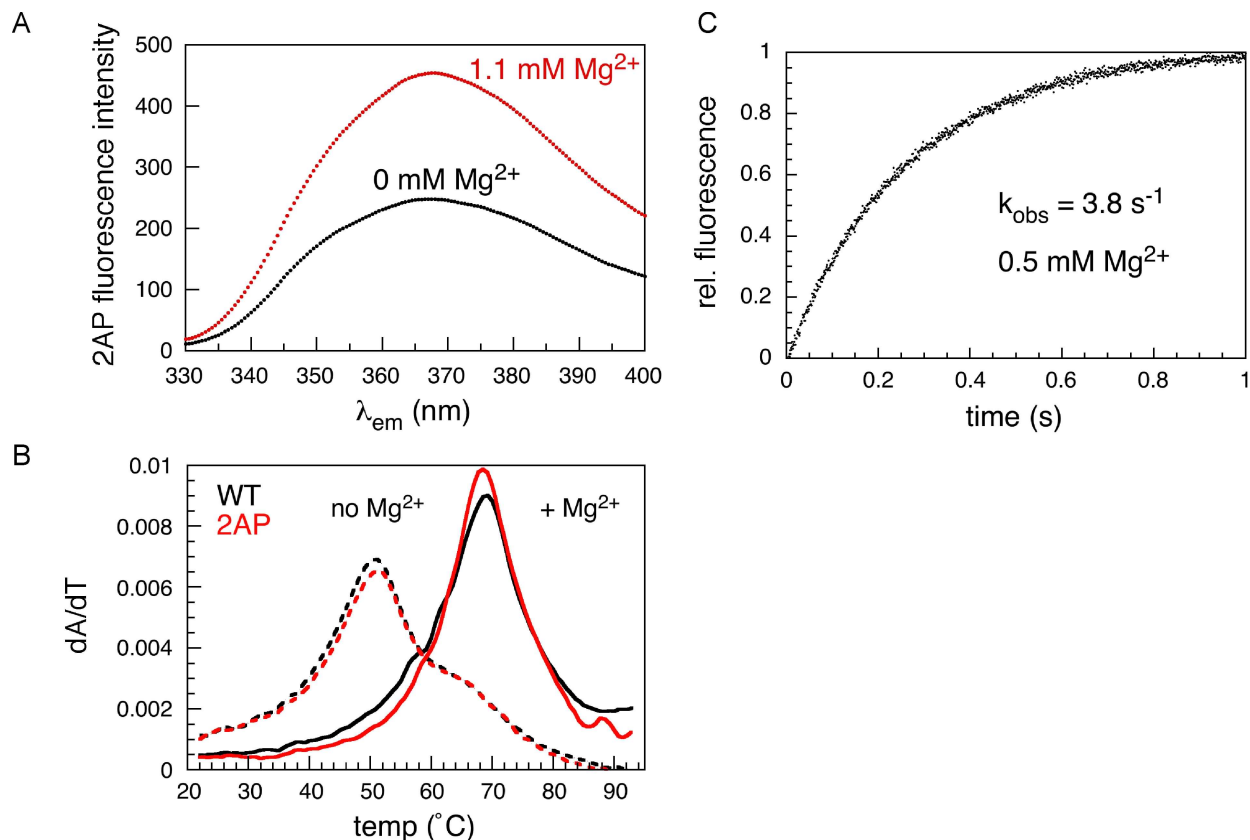

**Figure S3. Fluorescence folding assay.** **A.** Emission spectrum of tP5abc-2AP, excited at 310 nm. The 2-aminopurine (2AP) base analog at position 185 unstacks when the RNA folds in  $Mg^{2+}$  (red) and the fluorescence intensity increases. **B.** Thermal melting of unmodified tP5abc and 2AP-substituted RNA. Dashed line, no  $MgCl_2$ ; solid line, 2.5 mM  $MgCl_2$ . Black, unmodified “wild type” tP5abc; red, 2AP modified tP5abc. The first derivative of the absorbance at 260 nm with respect to temperature was fit to two transitions, which were nearly identical in the two RNAs. See Table S1 for fit parameters. **C.** Stopped-flow fluorescence of the folding reaction at 30  $^{\circ}C$  in 0.5 mM  $MgCl_2$  (final). The data were fit by a single exponential rate equation.

**FIGURE S4**

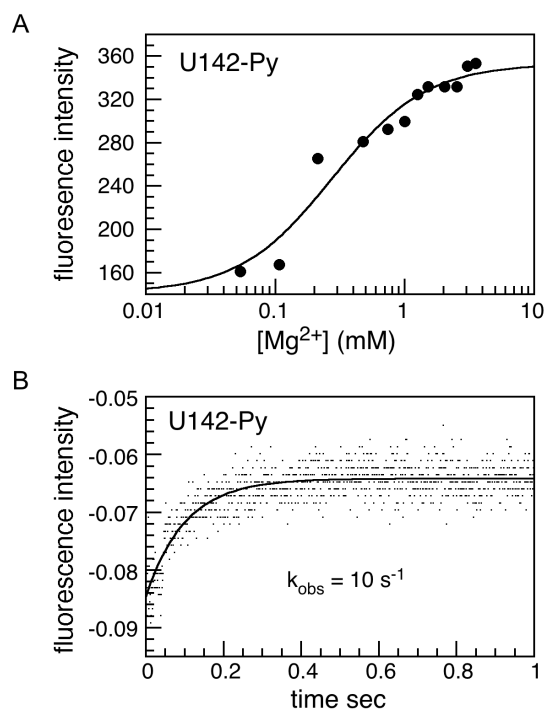

**Figure S4. Folding of pyrene-labeled P5abc.** tP5abc RNA was conjugated to pyrene through the 2' OH of U142. **A.**  $Mg^{2+}$ -dependence of folding in CE buffer. The relative change in fluorescence was fit to the Hill equation, with  $C_m \approx 0.28$  mM, compared to 0.18 mM for 2AP-P5abc. **B.** Progress curve for refolding in 0.5 mM  $MgCl_2$ , with an observed rate constant  $\sim 6\text{-}10 \text{ s}^{-1}$ .

**FIGURE S5**

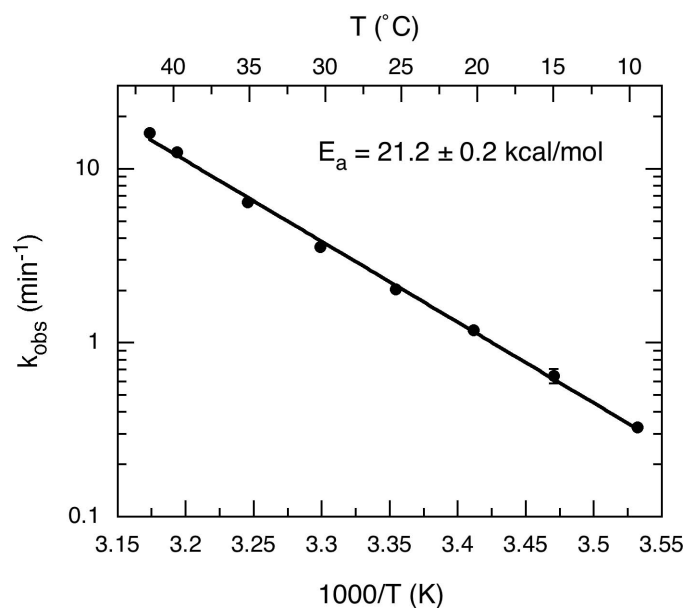

**Figure S5. Thermal activation energy of tP5abc folding.** Observed folding rates in 0.5 mM  $\text{Mg}^{2+}$  were measured between 10 $^{\circ}$  and 40 $^{\circ}\text{C}$ . Errors are the standard deviation of rate constants from three stopped-flow traces. Data were fit to the Arrhenius equation.

**FIGURE S6**

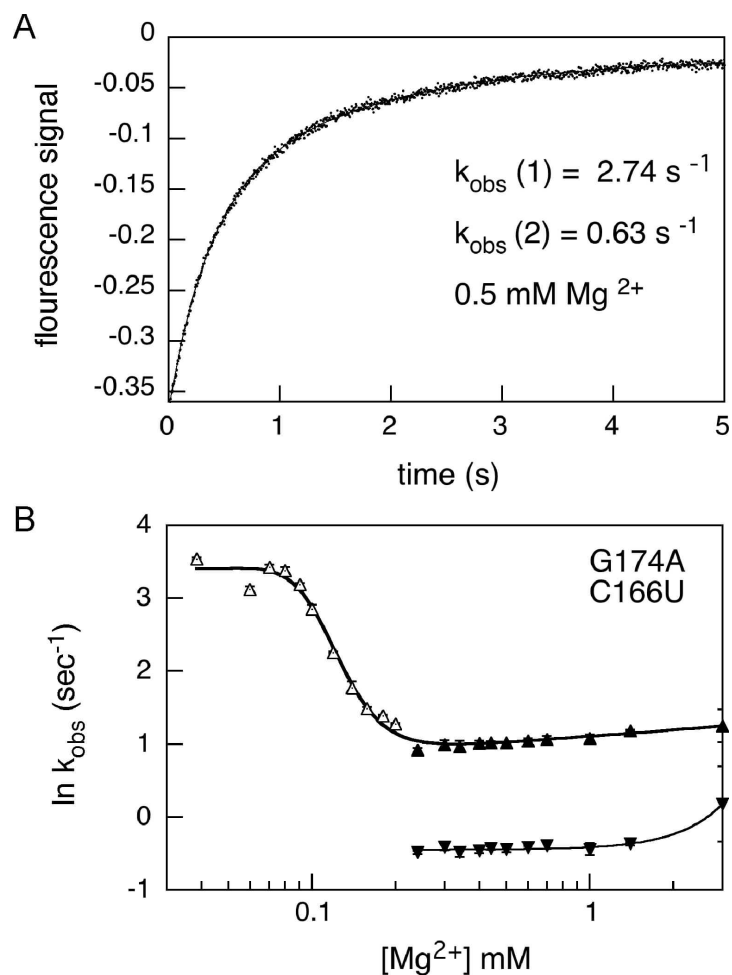

**Figure S6. Folding of tP5abc:C166U,G174A.** Biphasic kinetics were observed for this mutant. **A.** Observed folding kinetics in 0.5 mM  $\text{MgCl}_2$ . The relative amplitude of the slow phase was 15%. **B.**  $\text{Mg}^{2+}$ -dependence of folding kinetics, showing that neither the fast nor the slow time constant increases with  $\text{Mg}^{2+}$ . Data fit as in Fig. 7.

**Table S1. Thermal stability of tP5abc RNA.**

| tP5abc                          | T <sub>m1</sub> (°C) | T <sub>m2</sub> (°C) | ΔH <sub>1</sub> (kcal/mol) | ΔH <sub>2</sub> (kcal/mol) |
|---------------------------------|----------------------|----------------------|----------------------------|----------------------------|
| <i>no Mg<sup>2+</sup>:</i>      |                      |                      |                            |                            |
| Wild type                       | 50.5                 | 67.5                 | 48.5                       | 64.0                       |
| U185 2AP                        | 50.9                 | 67.5                 | 49.2                       | 70.6                       |
| A186U                           | 49.9                 | 55.7                 | 46.8                       | 55.6                       |
| <i>+2.5 mM Mg<sup>2+</sup>:</i> |                      |                      |                            |                            |
| Wild type                       | 58.7                 | 69.2                 | 38.6                       | 62                         |
| U185 2AP                        | 59.1                 | 68.7                 | 35.9                       | 59.9                       |
| A186U                           | 66.9                 | 67.6                 | 23.9                       | 37.6                       |

Thermal denaturation was performed in 10 mM Na-cacodylate and 40 mM NaCl. The temperatures and enthalpies of unfolding transitions were obtained using Global Melt Fit as described in Methods.

**Table S2. Mg<sup>2+</sup>-dependence of tP5abc folding.**

| P5abc        | C <sub>m</sub> (mM) <sup>a</sup> | n <sub>H</sub> <sup>a</sup> | ΔG <sub>UN</sub> (kcal/mol) <sup>b</sup> |
|--------------|----------------------------------|-----------------------------|------------------------------------------|
| Wild type    | 0.18 ± 0.01                      | 2.7 ± 0.2                   | -1.3 ± 0.5                               |
| + 60 mM NaCl | 1.8 ± 0.3                        | 1.8 ± 0.4                   | - 0.8 ± 0.2                              |
| U168C        | 0.19 ± 0.02                      | 3.4 ± 0.2                   | -1.9 ± 0.4                               |
| A173G        | 0.19 ± 0.01                      | 3.2 ± 0.1                   | -1.9 ± 0.2                               |
| G174A,C166U  | 0.21 ± 0.01                      | 3.1 ± 0.1                   | -1.9 ± 0.1                               |

<sup>a</sup> Midpoints (C<sub>m</sub>) and Hill constants (n<sub>H</sub>) were obtained from the fits of 2-aminopurine fluorescence intensity at 370 nm versus Mg<sup>2+</sup> to the Hill equation at 30 °C. The error is the deviation between two independent data sets. <sup>b</sup> ΔG<sub>UN</sub> was calculated from the cooperativity of the folding transition around the midpoint (Materials and Methods), and is thus more sensitive to the slope of the transition than the midpoint. The error is the deviation between two independent trials.

**Table S3. Folding kinetics of tP5abc and transition state structure.**

| P5abc                     | k <sub>U</sub> (s <sup>-1</sup> ) <sup>a</sup> | k <sub>F</sub> (s <sup>-1</sup> ) <sup>b</sup> | n <sub>U</sub> <sup>‡c</sup> | n <sub>F</sub> <sup>‡c</sup> | β <sub>U</sub> <sup>d</sup> | β <sub>F</sub> <sup>d</sup> |
|---------------------------|------------------------------------------------|------------------------------------------------|------------------------------|------------------------------|-----------------------------|-----------------------------|
| Wild type                 | 28 ± 1                                         | 4.1 ± 0.1                                      | -1.9                         | 0.1                          | 0.7                         | 0.04                        |
| + 60 mM NaCl              | 16.5 ± 0.3                                     | 4.4 ± 0.06                                     | -0.7                         | 0.04                         | 0.4                         | 0.02                        |
| U168C                     | 21.7 ± 0.6                                     | 3.4 ± 0.02                                     | -3.1                         | 0.2                          | 0.9                         | 0.06                        |
| A173G                     | 29 ± 1.7                                       | 3.1 ± 0.04                                     | -3.2                         | 0.1                          | 1                           | 0.03                        |
| <sup>e</sup> G174A, C166U | 29 ± 1.3                                       | 3.0 ± 0.2                                      | -2.7                         | 0.1                          | 0.9                         | 0.04                        |

<sup>a</sup> Unfolding rate constant in 0.08 mM MgCl<sub>2</sub>, or 0.23 mM MgCl<sub>2</sub> plus 60 mM NaCl, at 30 °C.

<sup>b</sup> Folding rate constant in 1 mM MgCl<sub>2</sub> or 5 mM MgCl<sub>2</sub> plus 60 mM NaCl. Errors are the standard deviation for at least three independent stopped flow traces. <sup>c</sup> n<sub>U</sub><sup>‡</sup> is the slope of ln(k<sub>obs</sub>)

versus  $\ln [\text{Mg}^{2+}]$  for the unfolding arm of the chevron plot (low  $\text{Mg}^{2+}$ );  $n_{\text{N}}^{\ddagger}$  is the slope for the folding arm of the chevron plot (high  $\text{Mg}^{2+}$ ). The errors in  $n_{\text{U}}^{\ddagger}$  and  $n_{\text{N}}^{\ddagger}$  from the fit are about  $\pm 20\%$ . <sup>d</sup>Calculated from  $\beta_{\text{U}} = n_{\text{U}}^{\ddagger} / n_{\text{H}}$  and  $\beta_{\text{F}} = n_{\text{F}}^{\ddagger} / n_{\text{H}}$ , respectively. <sup>e</sup>Folding of P5abc:G174A C166U is biphasic; the dependence of the faster phase on  $\text{Mg}^{2+}$  was used to calculate  $\beta_{\text{F}}$ . For the slower phase,  $k_{\text{F},2} = 0.64 \text{ s}^{-1}$  and the amplitude was 15%.
